# Supplementary material
Source: PubMed Central journal article supplement (PMC4818722)

## Supplementary Material:

### Supplementary Tables

**Supplementary Table S1. Adverse events that led to dose interruption or reduction**

| Adverse Events                                                                                                        | *N of AEs | %     |
|-----------------------------------------------------------------------------------------------------------------------|-----------|-------|
| ALT (G2/3/4) <sup>a</sup>                                                                                             | 9         | 33.3% |
| Rash (G2/3) <sup>b</sup>                                                                                              | 9         | 33.3% |
| Diarrhea (G3)                                                                                                         | 2         | 7.4%  |
| Confusion (G2)                                                                                                        | 1         | 3.7%  |
| hyperglycemia (G3)                                                                                                    | 1         | 3.7%  |
| Pruritis (G3)                                                                                                         | 1         | 3.7%  |
| Pneumonitis (G2)                                                                                                      | 1         | 3.7%  |
| Tremor (G3)                                                                                                           | 1         | 3.7%  |
| Dizziness (G3)                                                                                                        | 1         | 3.7%  |
| LVEF (G3)                                                                                                             | 1         | 3.7%  |
| Total                                                                                                                 | 27        | 100%  |
| a, ALT: G2 (n=2), G3 (n=6), G4 (n=1); b, Rash: G2 (n=1), G3 (n=8). *Note that some patients experienced multiple AEs. |           |       |

**Supplementary Table S2. Treatment-related Psychiatric Adverse Events (AEs)**

| AE                                                                                                                           | Grade 1        | Grade 2        | Number (%) of patients |
|------------------------------------------------------------------------------------------------------------------------------|----------------|----------------|------------------------|
| Anxiety                                                                                                                      | 2 <sup>A</sup> | 1 <sup>B</sup> | 3 (9.7%)               |
| Confusion                                                                                                                    |                | 1              | 1 (3.2%)               |
| Depression                                                                                                                   | 4 <sup>A</sup> | 1 <sup>B</sup> | 5 (16.1%)              |
| N patients                                                                                                                   | 5              | 2              | 7 (22.6%)              |
| A: 1 patient had both grade 1 anxiety and grade 1 depression<br>B: 1 patient had both grade 2 anxiety and grade 2 depression |                |                |                        |

**Supplementary Table S3. All observed coding mutations with detailed annotations**

Available for download online as a spreadsheet.

**Supplementary Table S4.****PgR Status of the Primary versus Metastatic (Recurrent) Disease of the 29 Evaluable Patients**

| Patients with de novo stage IV   |                   |                   |          | Patients who recurred from an initial early stage cancer |                   |                   |           |
|----------------------------------|-------------------|-------------------|----------|----------------------------------------------------------|-------------------|-------------------|-----------|
| Primary\Metastatic<br>PgR status | Negative<br>N (%) | Positive<br>N (%) | Total    | Primary\Recurrent<br>PgR status                          | Negative<br>N (%) | Positive<br>N (%) | Total     |
| Negative, N (%)                  | 0                 | 0                 | <b>0</b> | Negative, N (%)                                          | 6 (75%)           | 2 (25%)           | <b>8</b>  |
| Positive, N (%)                  | 0                 | 4                 | <b>4</b> | Positive, N (%)                                          | 5 (33.3%)         | 10 (66.7%)        | <b>15</b> |
| Unknown, N                       | 0                 | 0                 | <b>0</b> | Unknown, N                                               | 0                 | 2                 | <b>2</b>  |
| Total                            | 0                 | 4                 | <b>4</b> | Total                                                    | 11                | 14                | <b>25</b> |

PgR positive is defined as at least 10% cells staining positive, or allred score more than 3.

## **Supplementary Figure Legends**

### **Supplementary Fig. S1. Buparlisib dosing intensity by treatment cohorts**

Average daily doses of buparlisib each cycle during the first 12 cycles by treatment cohort are shown. For phase IB, the average daily doses of buparlisib on drug administration days as well as on all days each cycle were graphed.

### **Supplementary Fig. S2. Mutations in selected genes observed in this trial in contrast to that in COSMIC data base**

**A. PIK3CA   B. AKT1   C. ERBB2   D. ESR1**

### **Supplementary Fig. S3 Immunohistochemistry (IHC) for PTEN expression on archival tumor specimens**

The positive stromal cell staining was used as internal control. Sections of MCF-7 (positive for PTEN) and BT-549 (negative for PTEN) cell blocks were also included in staining as positive and negative controls, respectively.

### **Supplementary Fig. S4 Kaplan-Meier Plot of Progression Free Survival Estimate by PgR status**

Kaplan-Meier Plot of PFS by PgR status of the primary breast cancer (A) or recurrent/metastatic disease (B) demonstrated a trend toward worse outcome with negative PgR status.

Suppl. Fig 1

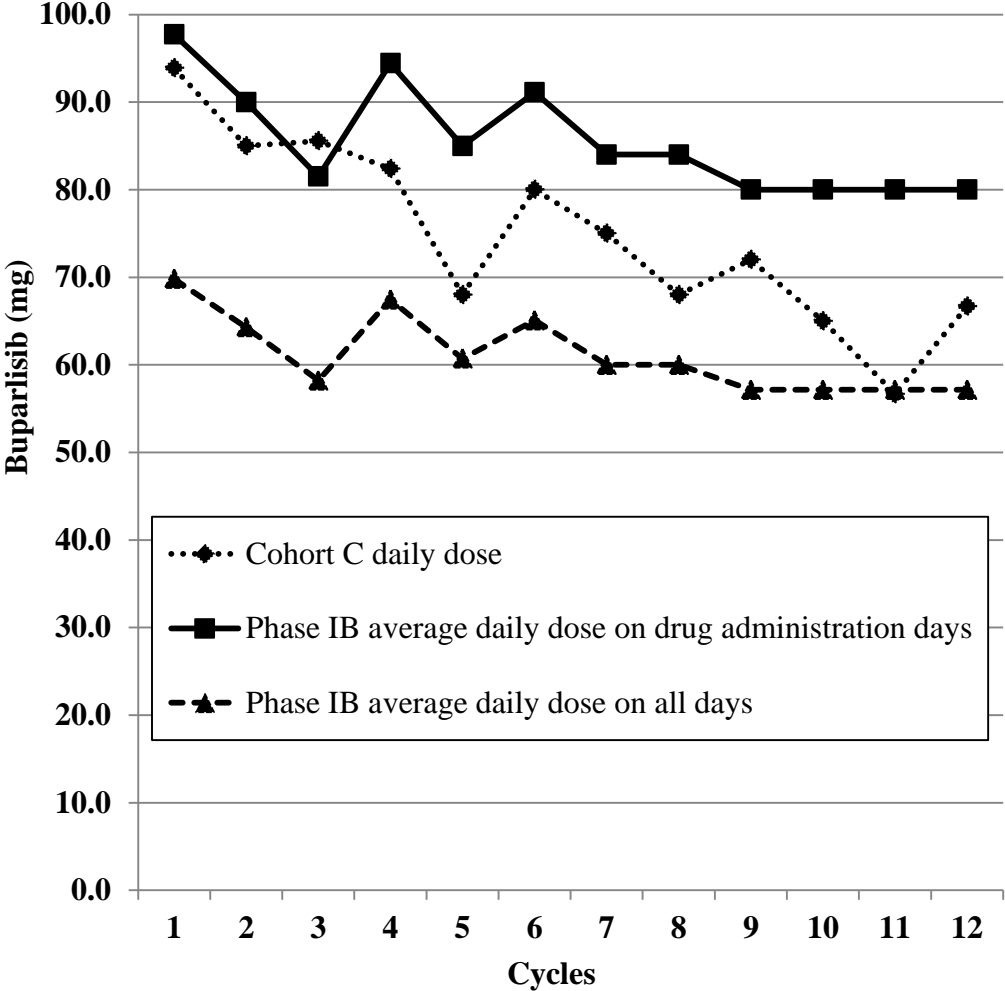

## Supplementary Figure S2

A

### PIK3CA mutations - BKM120 vs COSMIC

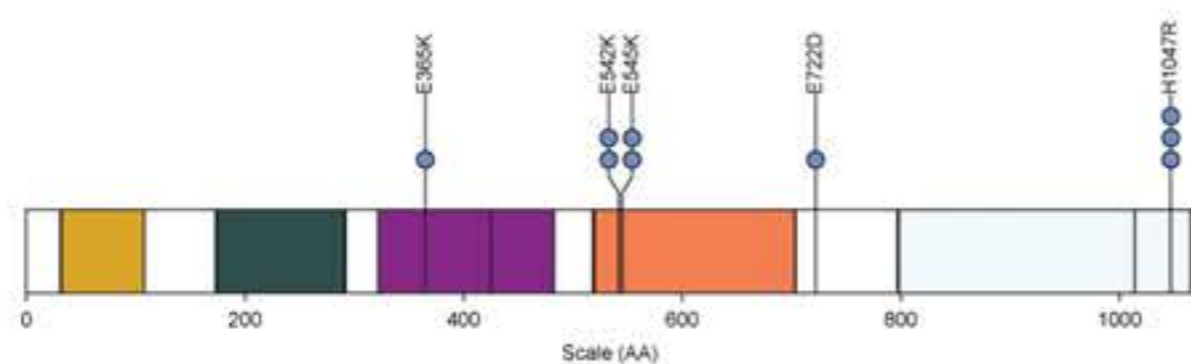

### Mutations observed in BKM120 study

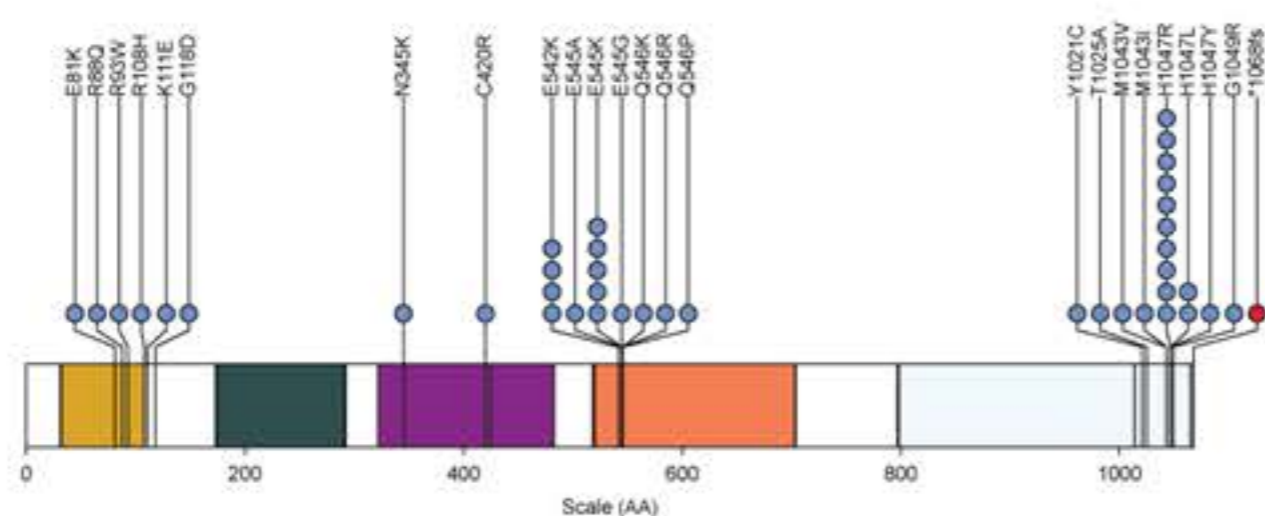

**COSMIC mutations**

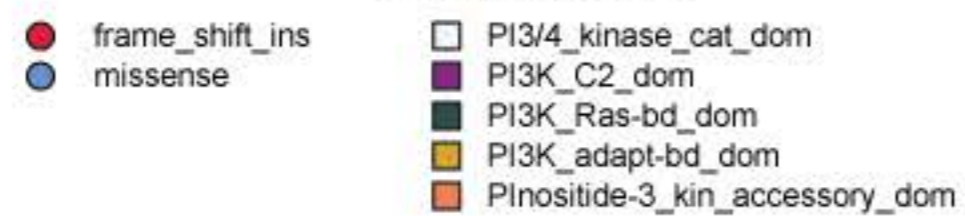

**C**

### ERBB2 mutations - BKM120 vs COSMIC

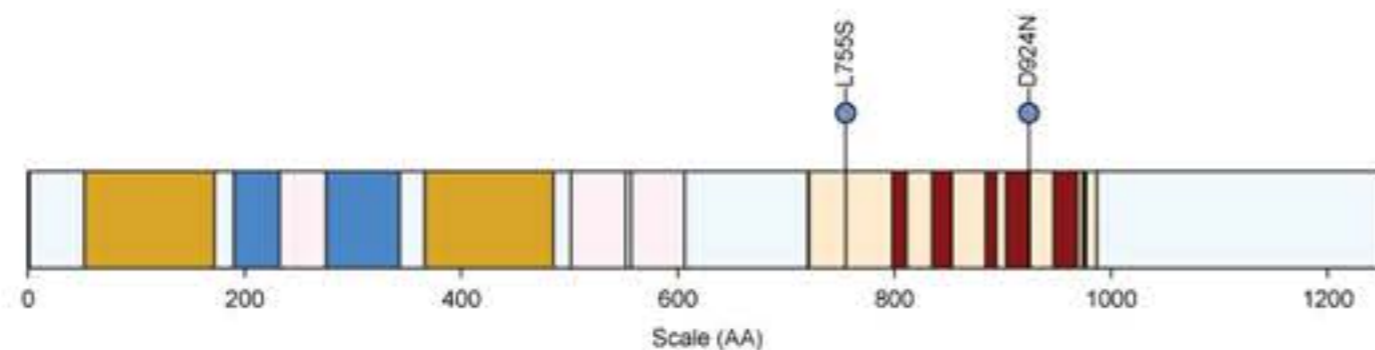

### Mutations observed in BKM120 study

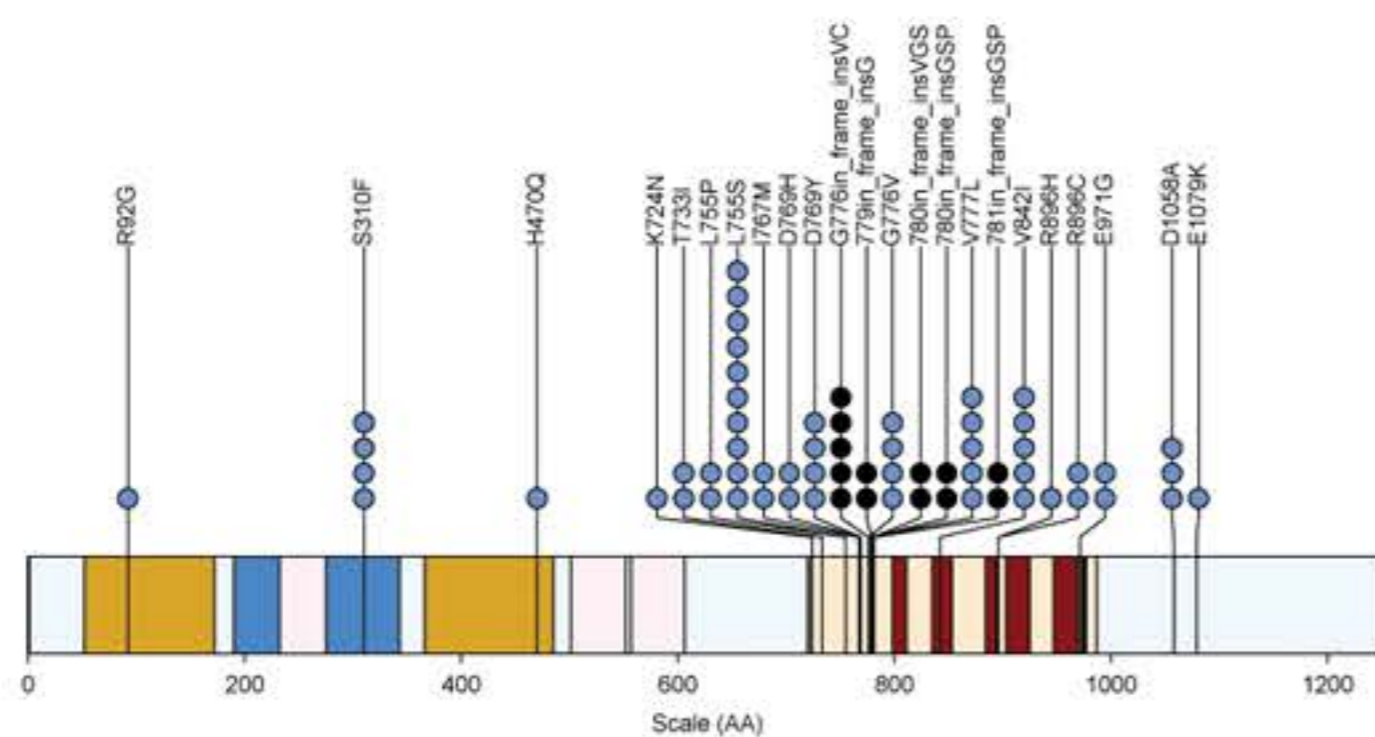

**COSMIC mutations**

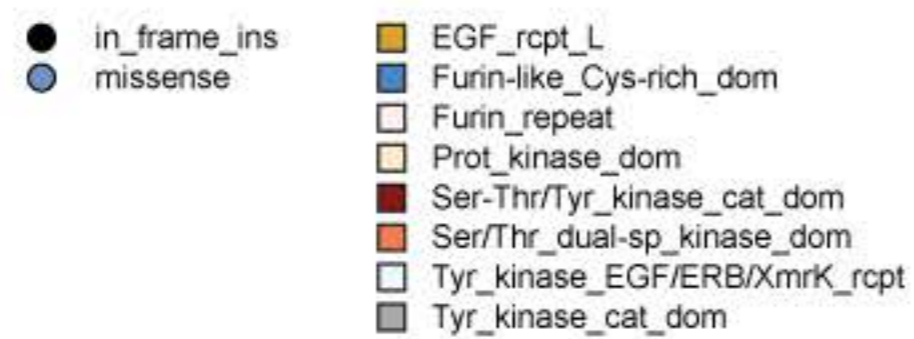

# B

### AKT1 mutations - BKM120 vs COSMIC

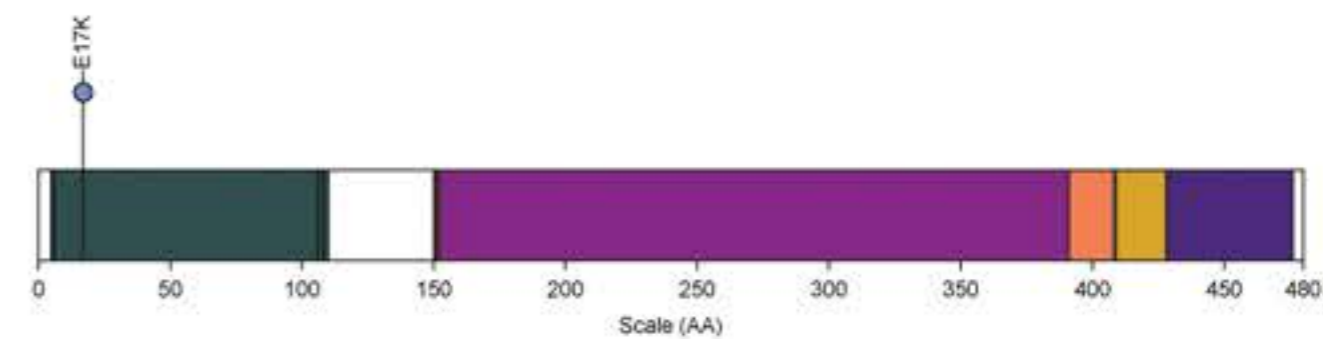

### Mutations observed in BKM120 study

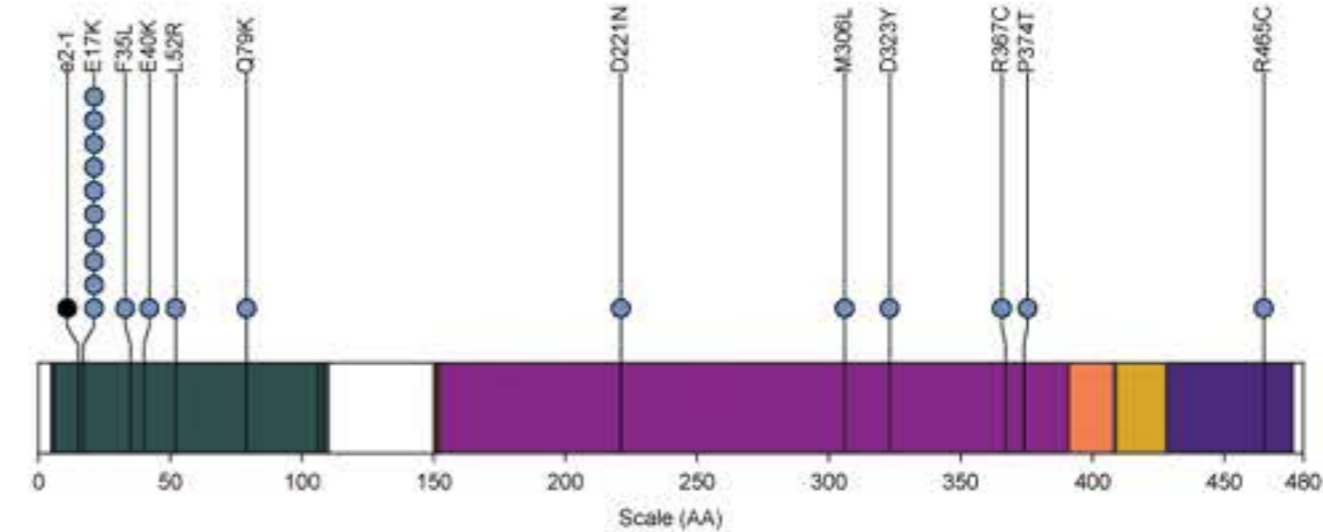

**COSMIC mutations**

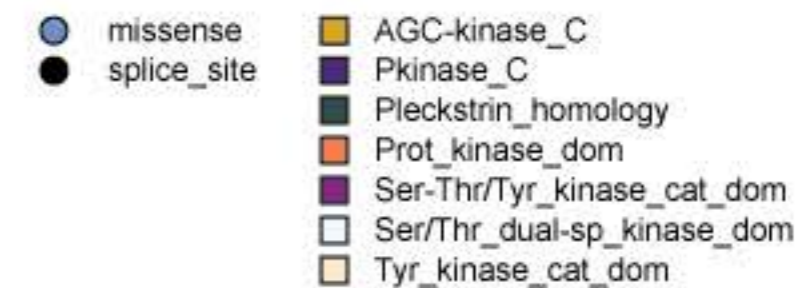

D

### ESR1 mutations - BKM120 vs COSMIC

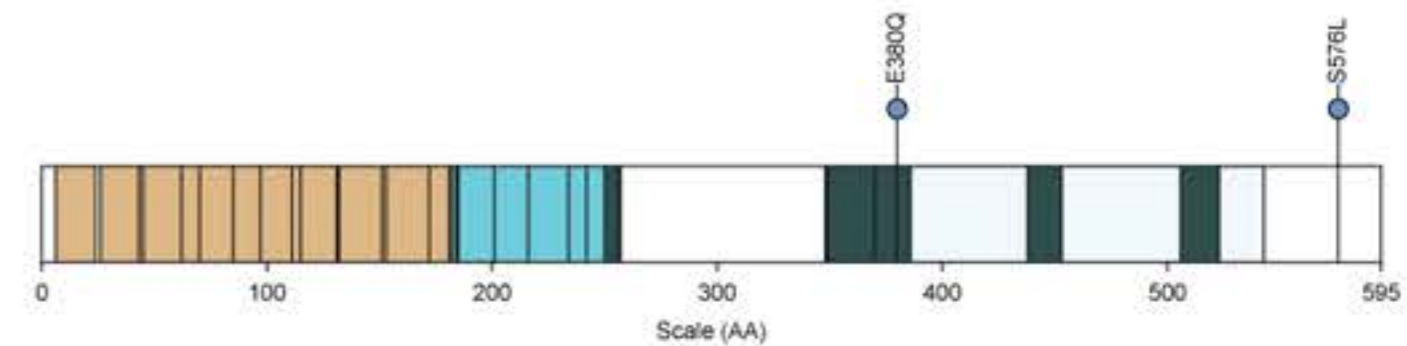

### Mutations observed in BKM120 study

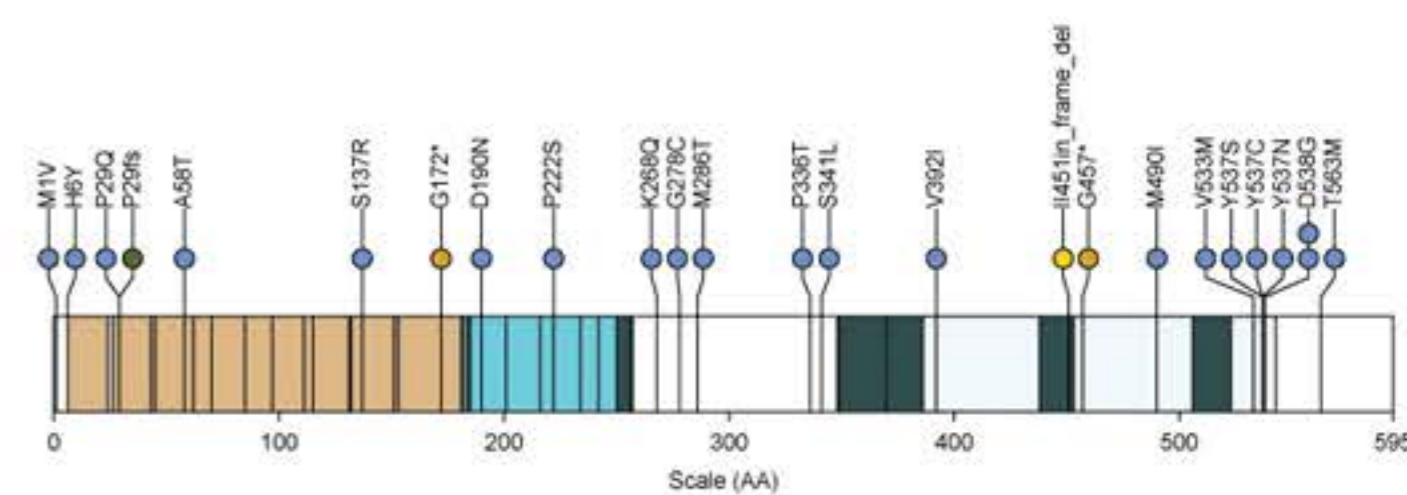

**COSMIC mutations**

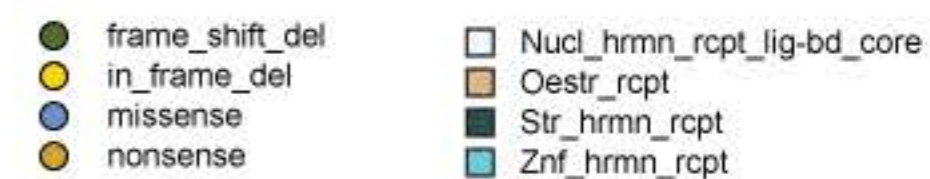

Supplementary figure S3

| Negative |                                                                                     | Positive |                                                                                      | Positive |                                                                                       |
|----------|-------------------------------------------------------------------------------------|----------|--------------------------------------------------------------------------------------|----------|---------------------------------------------------------------------------------------|
| PTEN     | 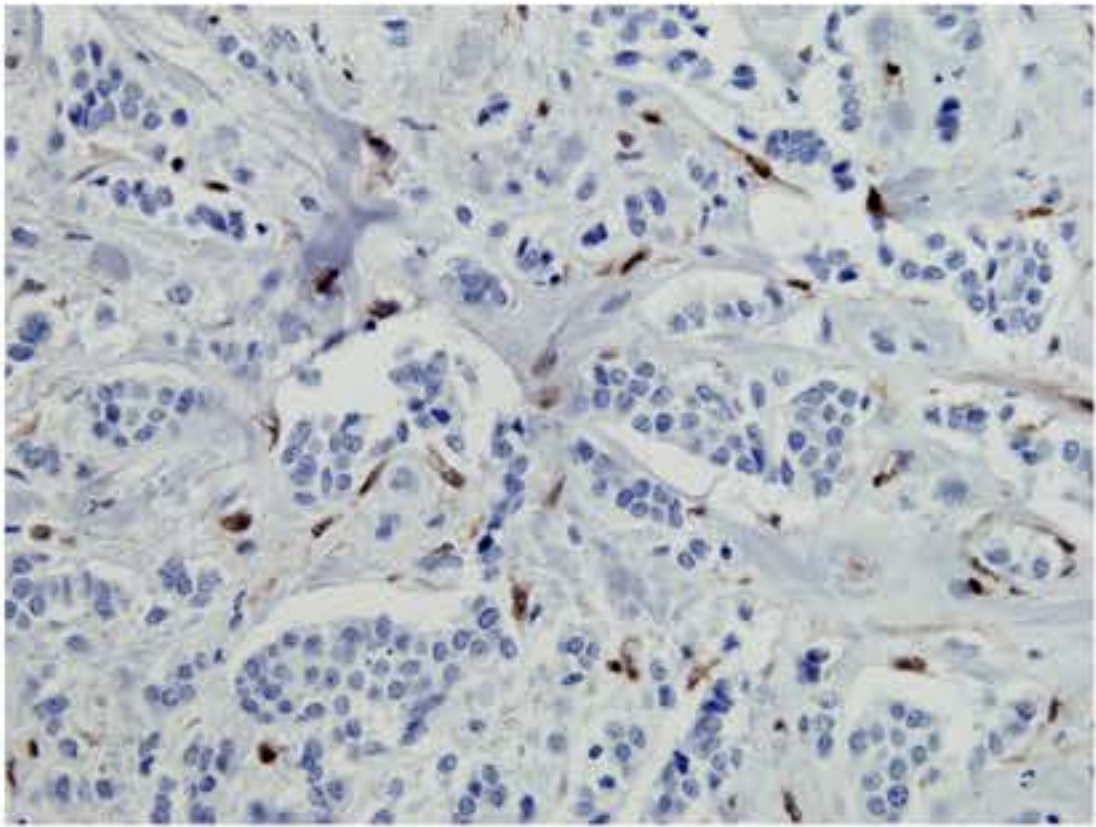   | 2        | 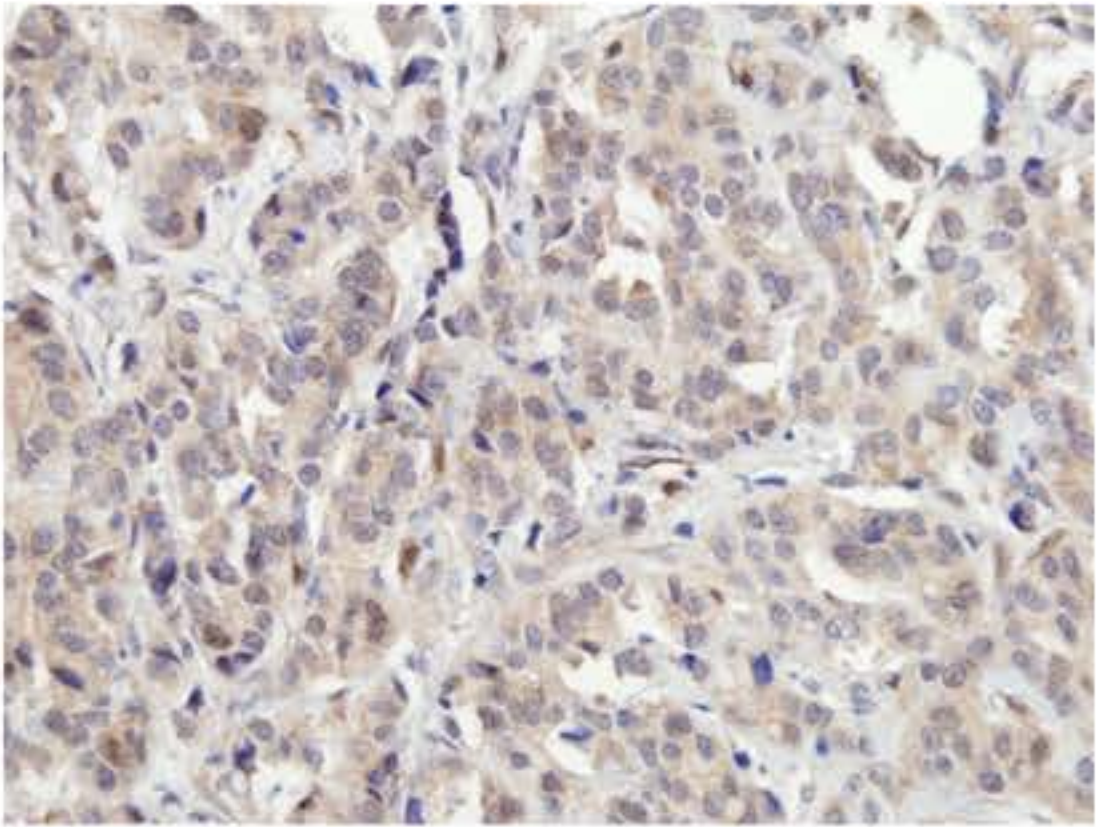   | 4        | 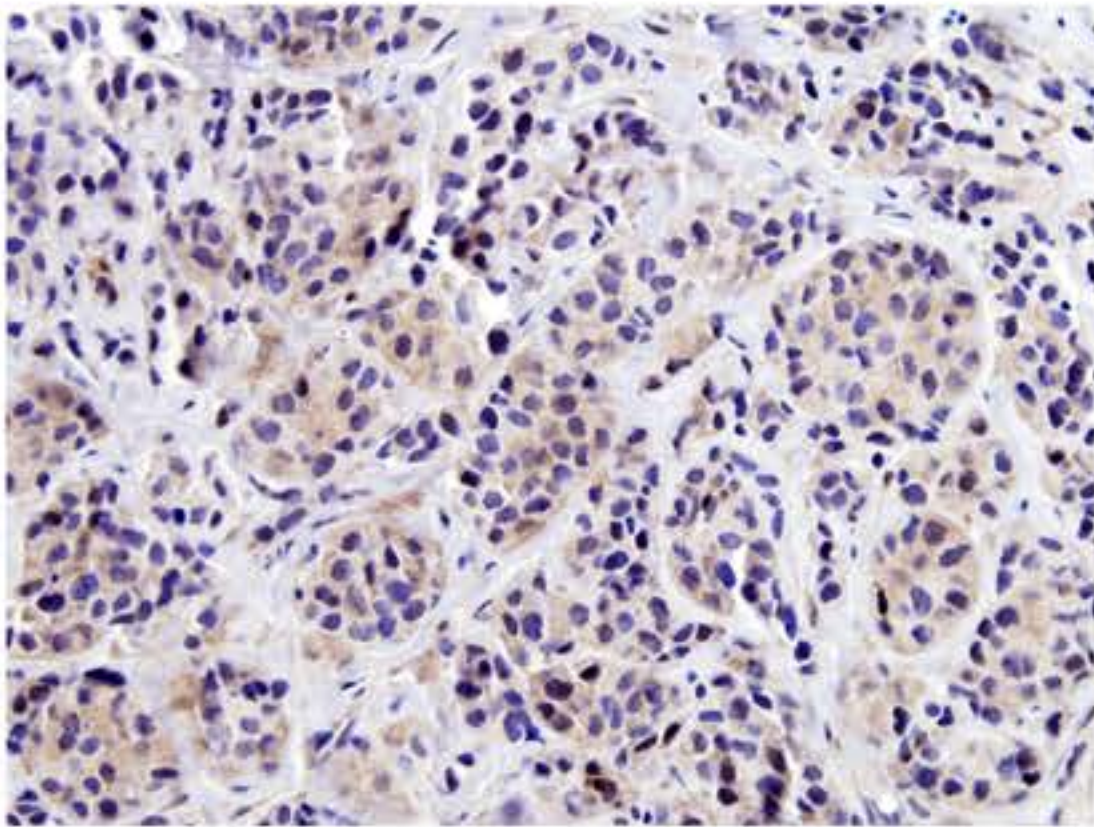   |
|          | 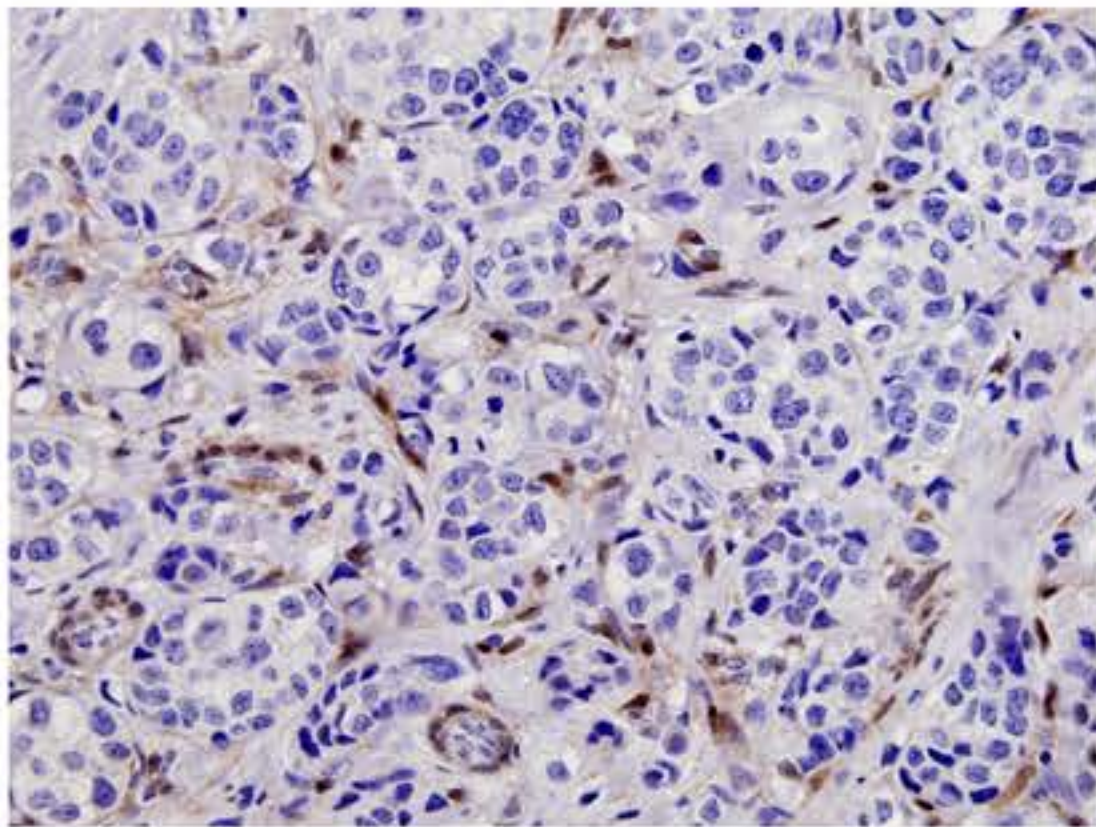  | 22       | 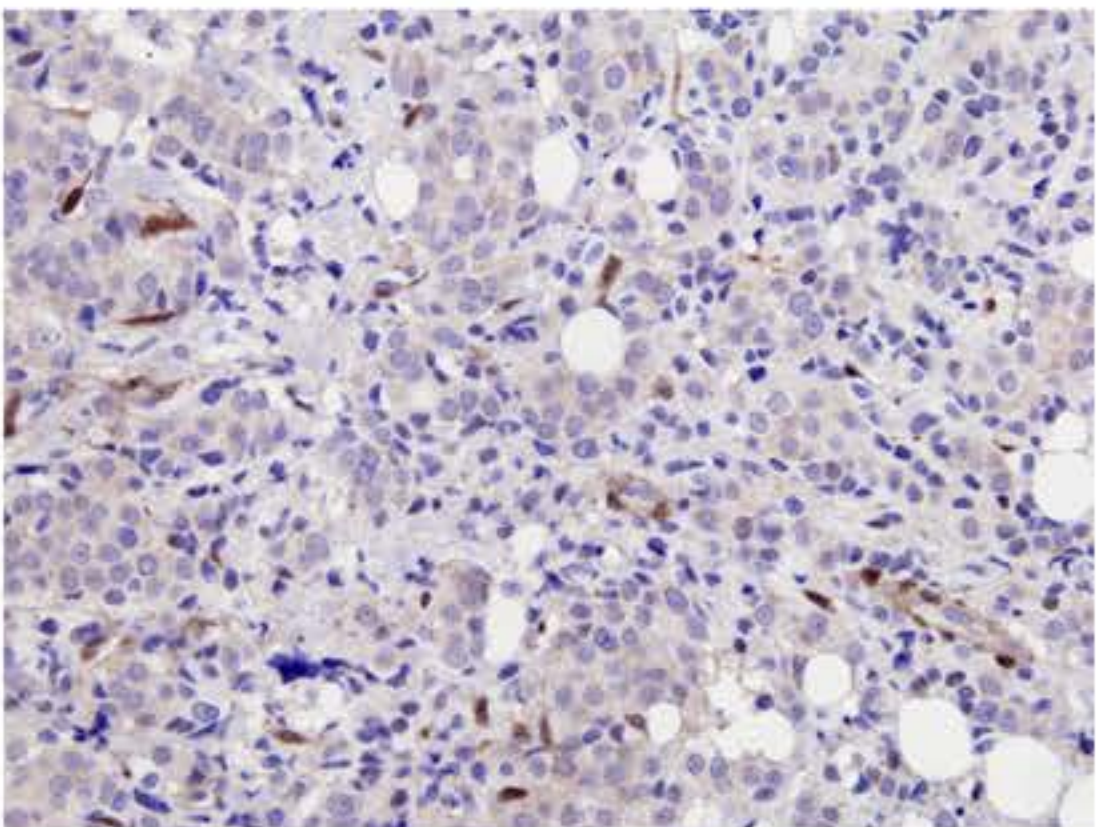  | 7        | 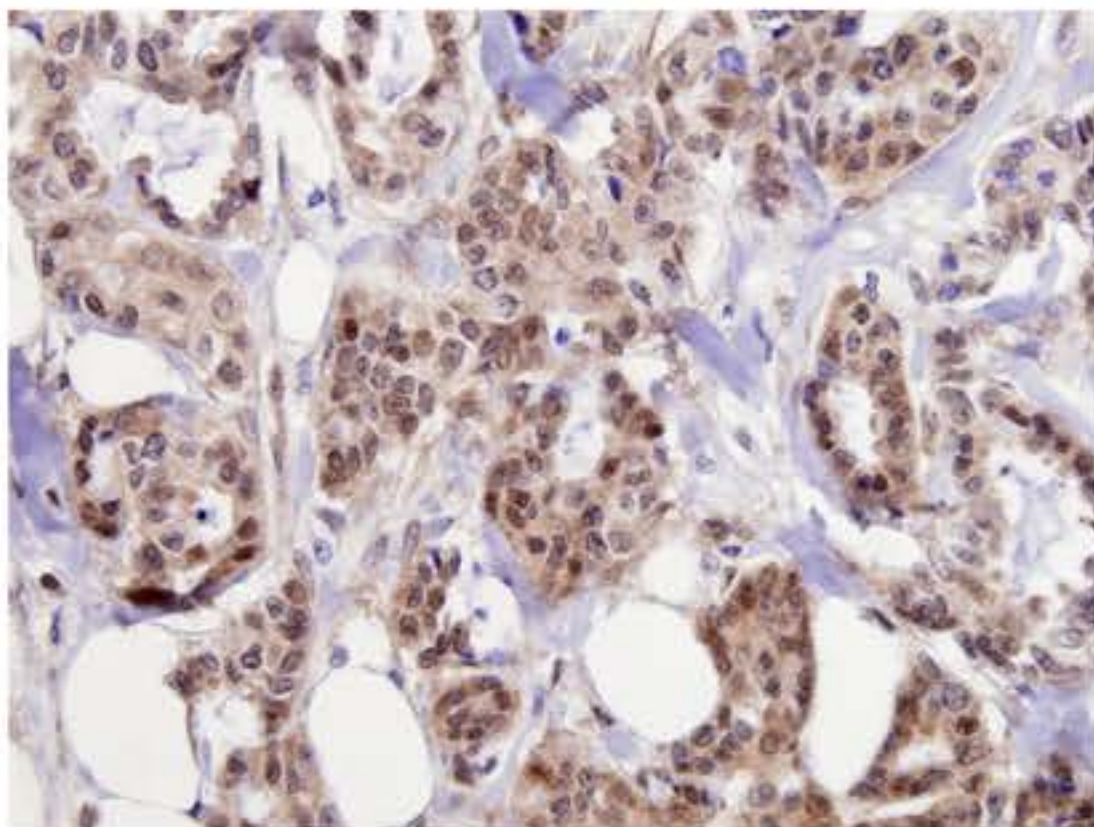  |
|          | 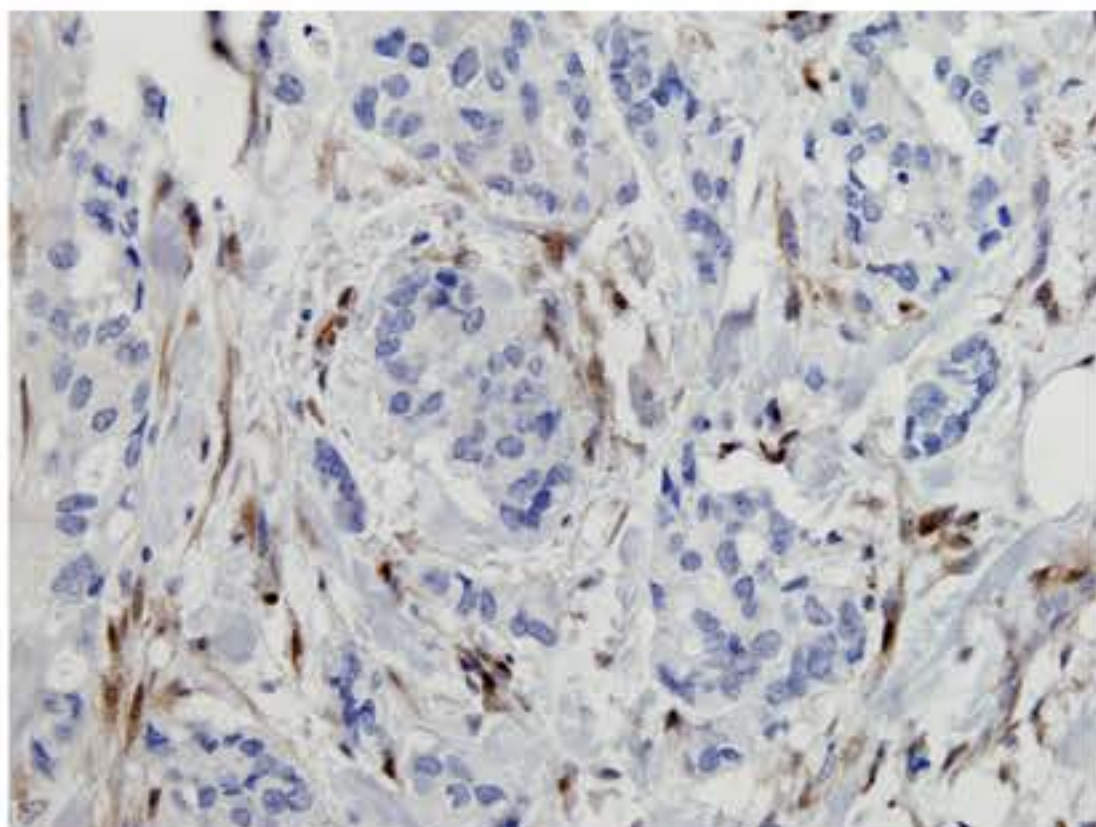 | 31       | 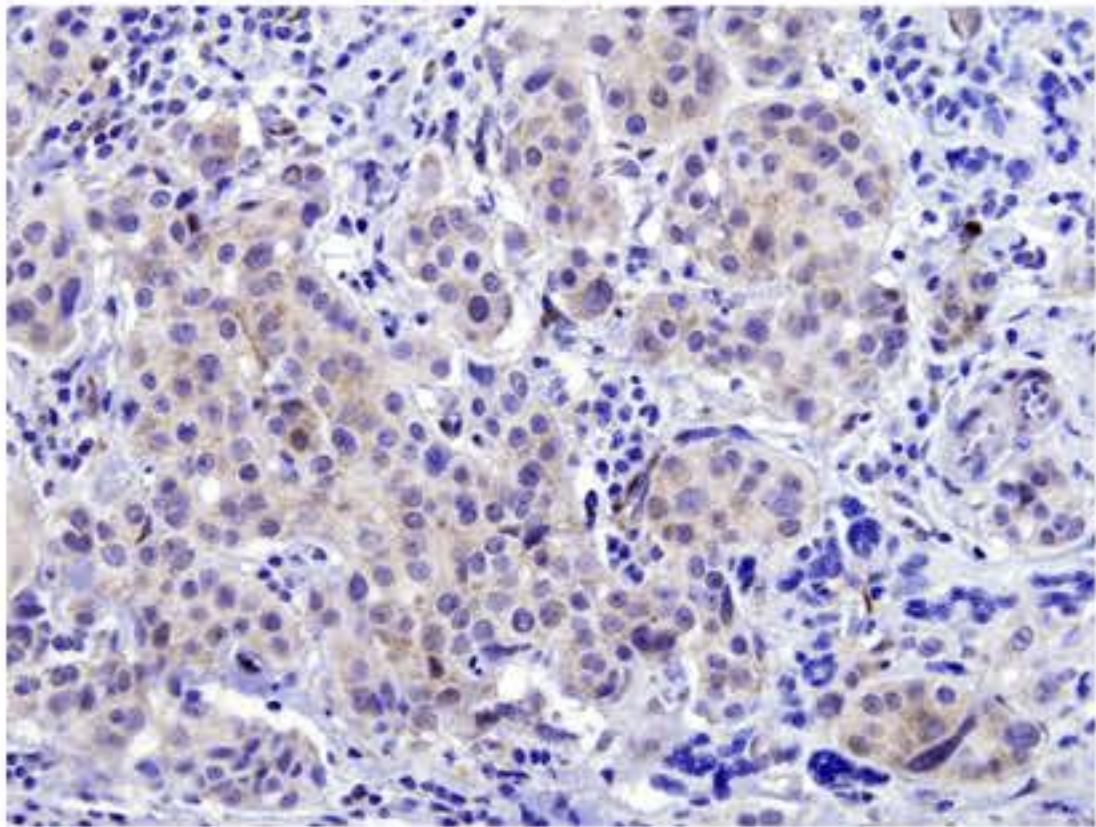 | 8        | 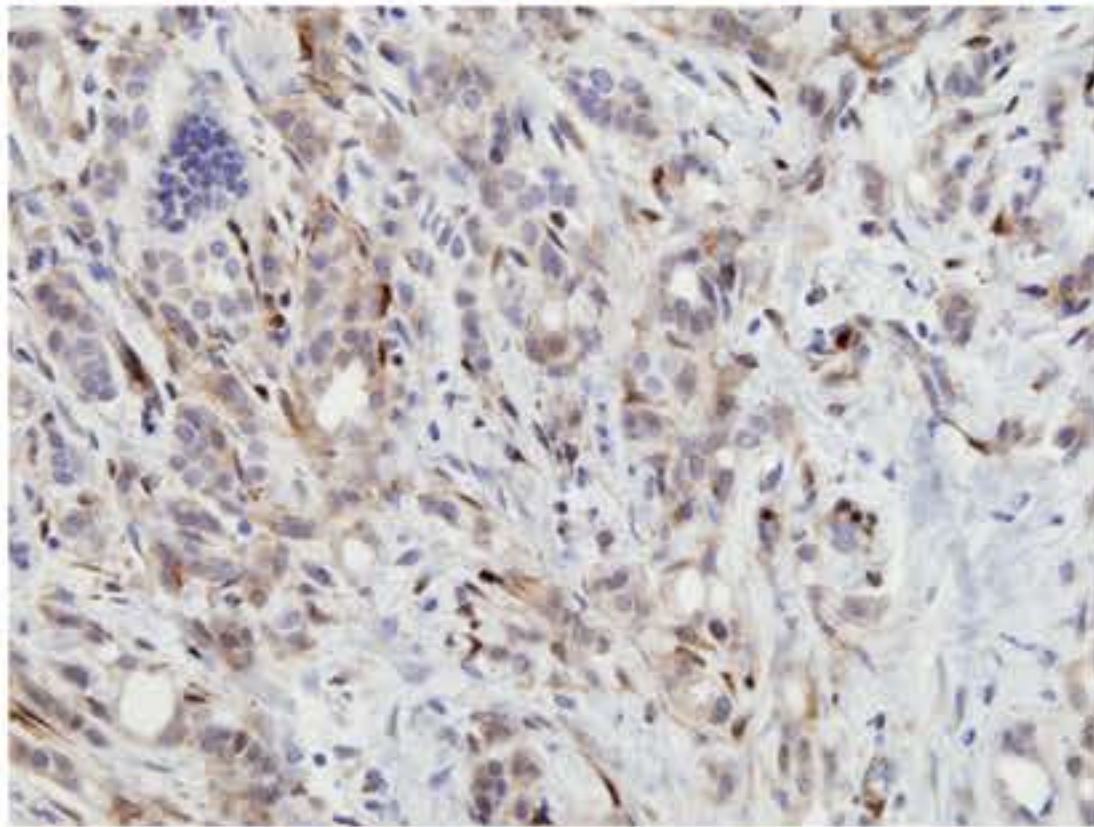 |
|          | 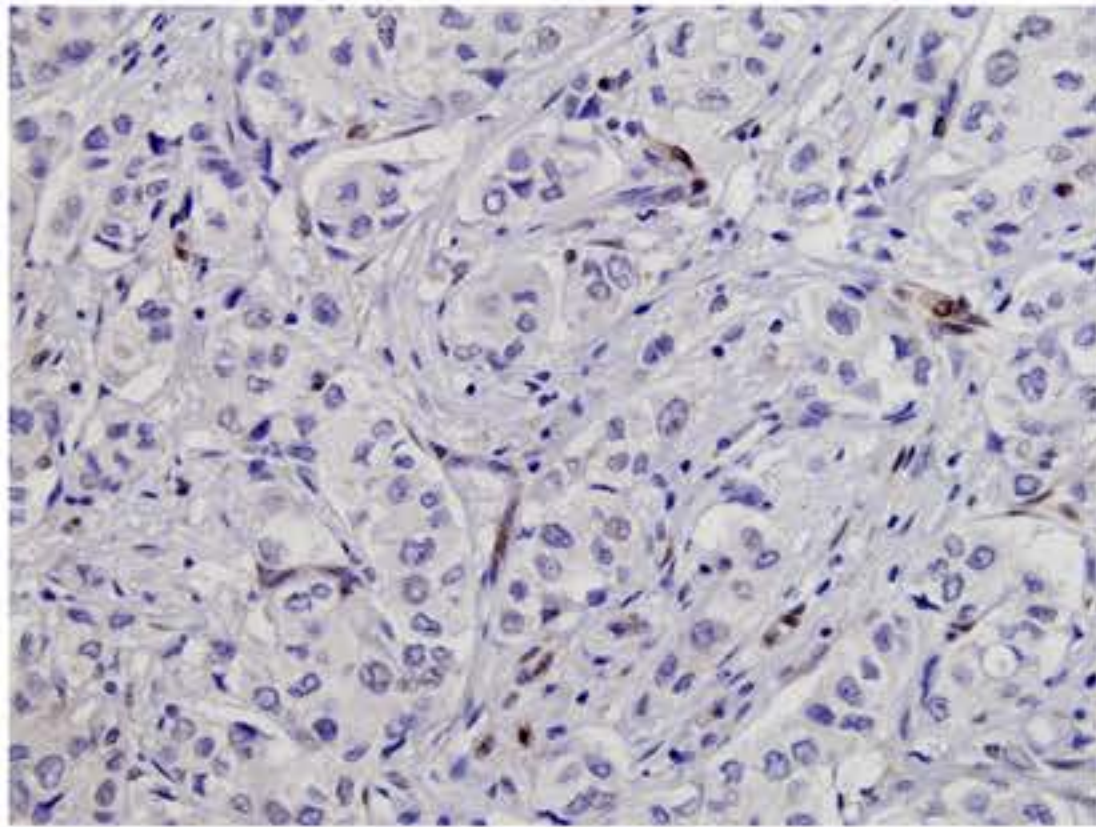 | 32       | 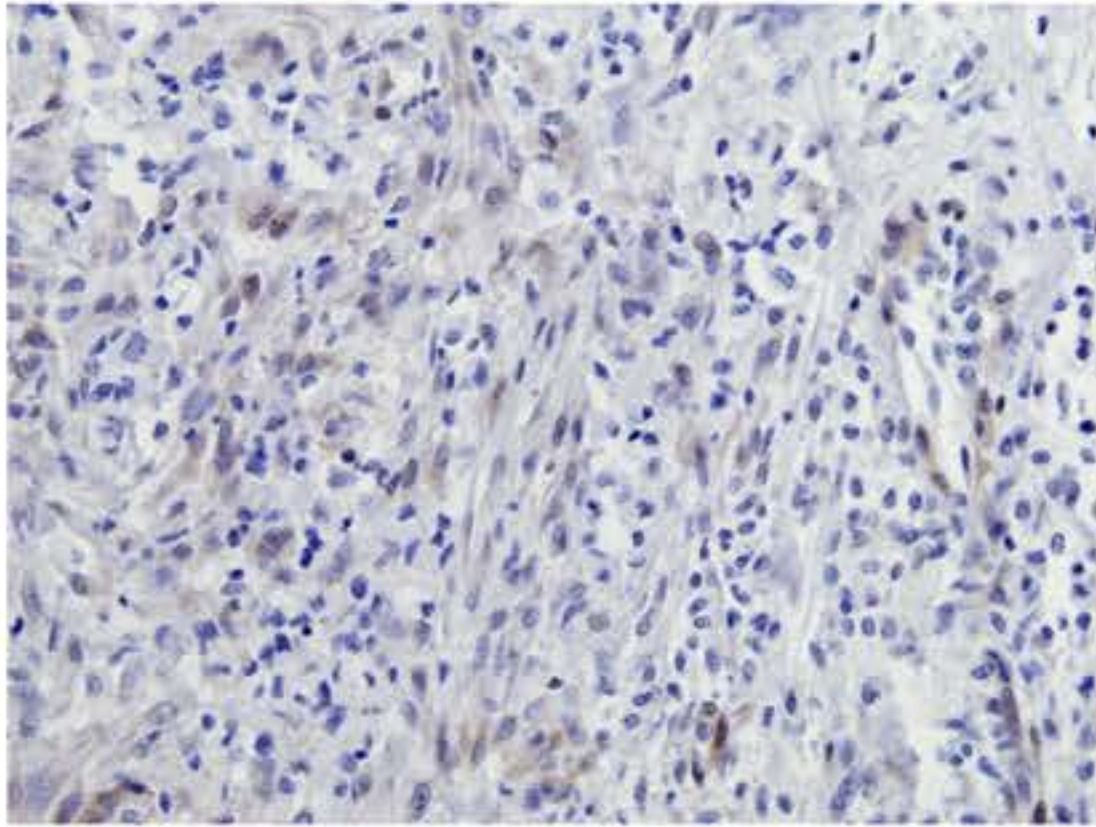 | 11       | 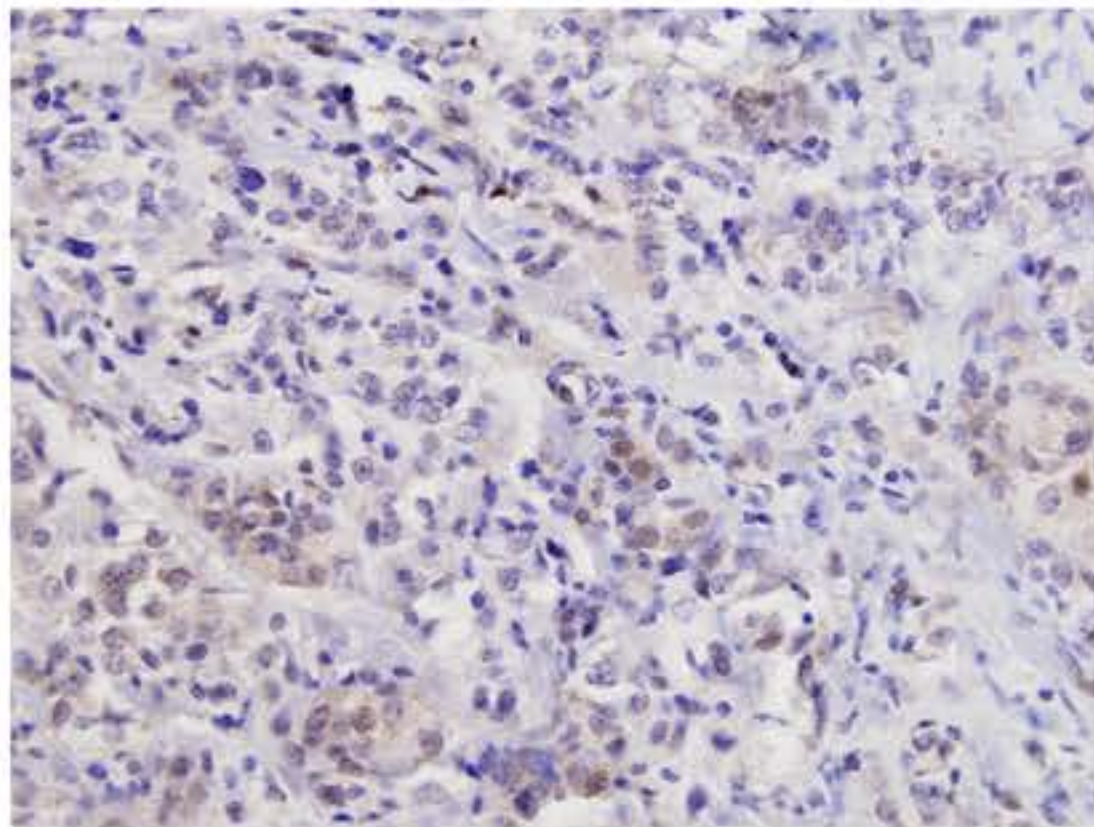 |
|          | 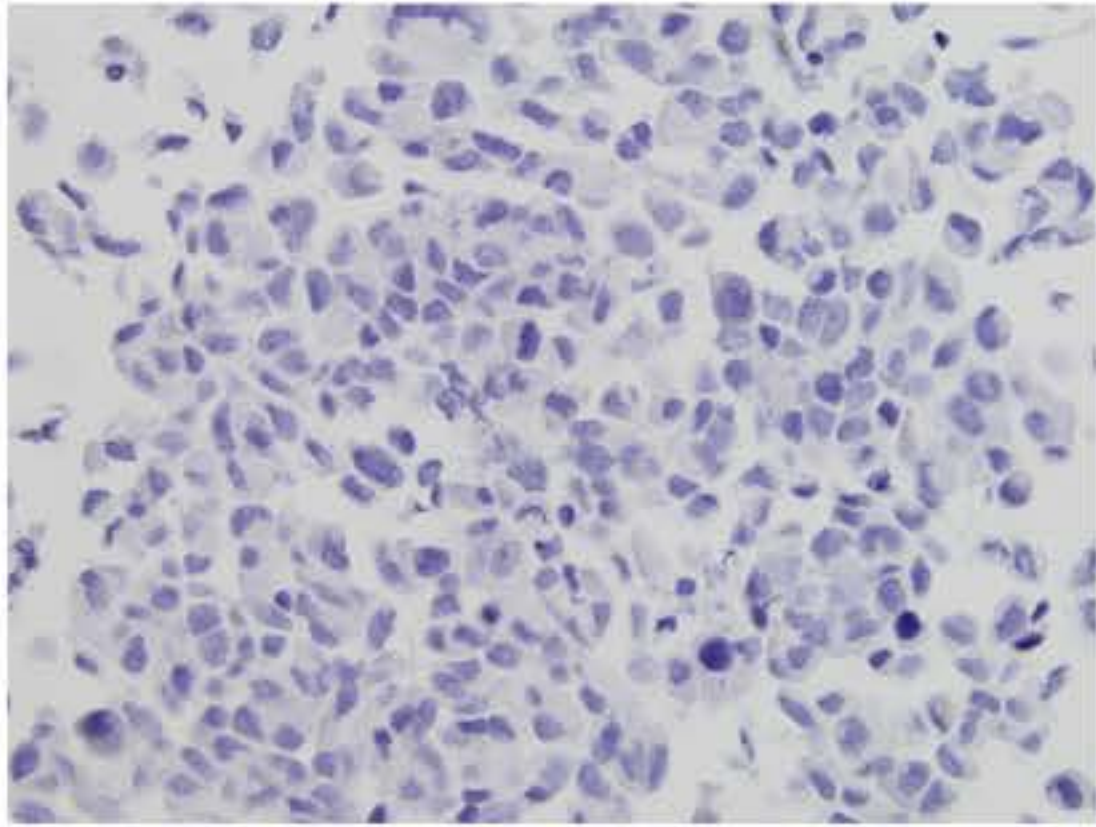 | BT-549   | 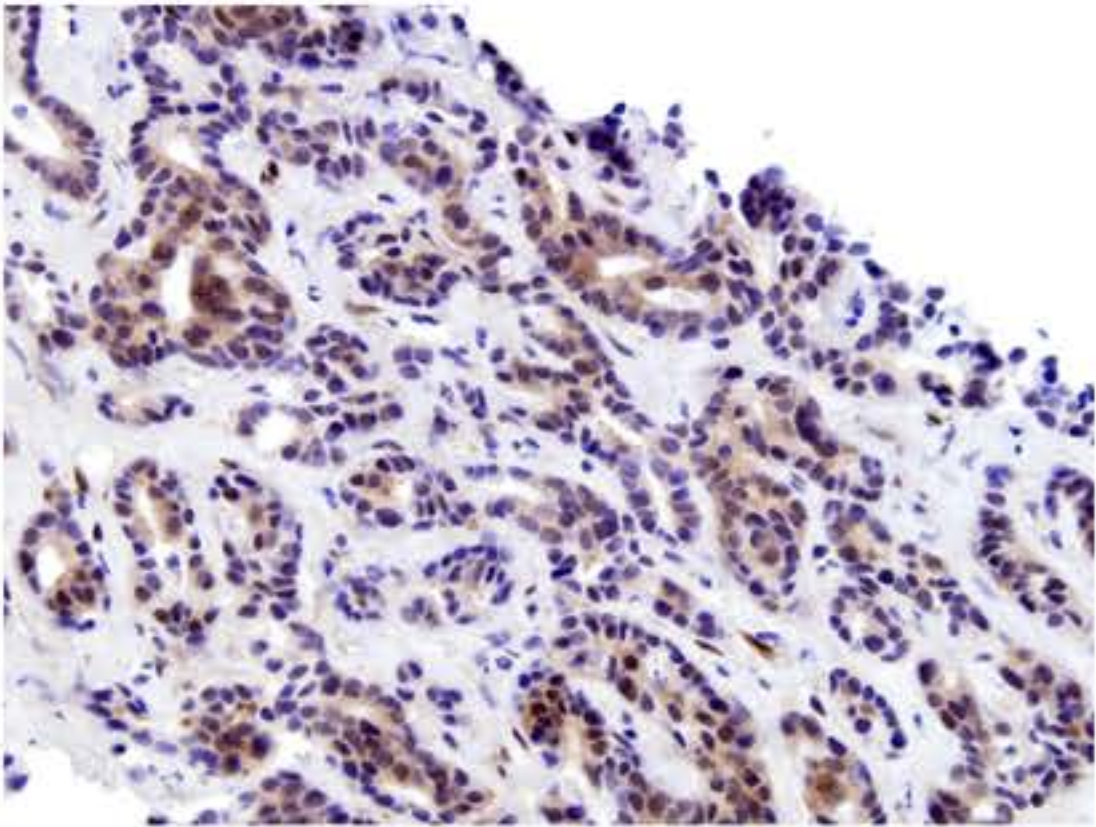 | 12       | 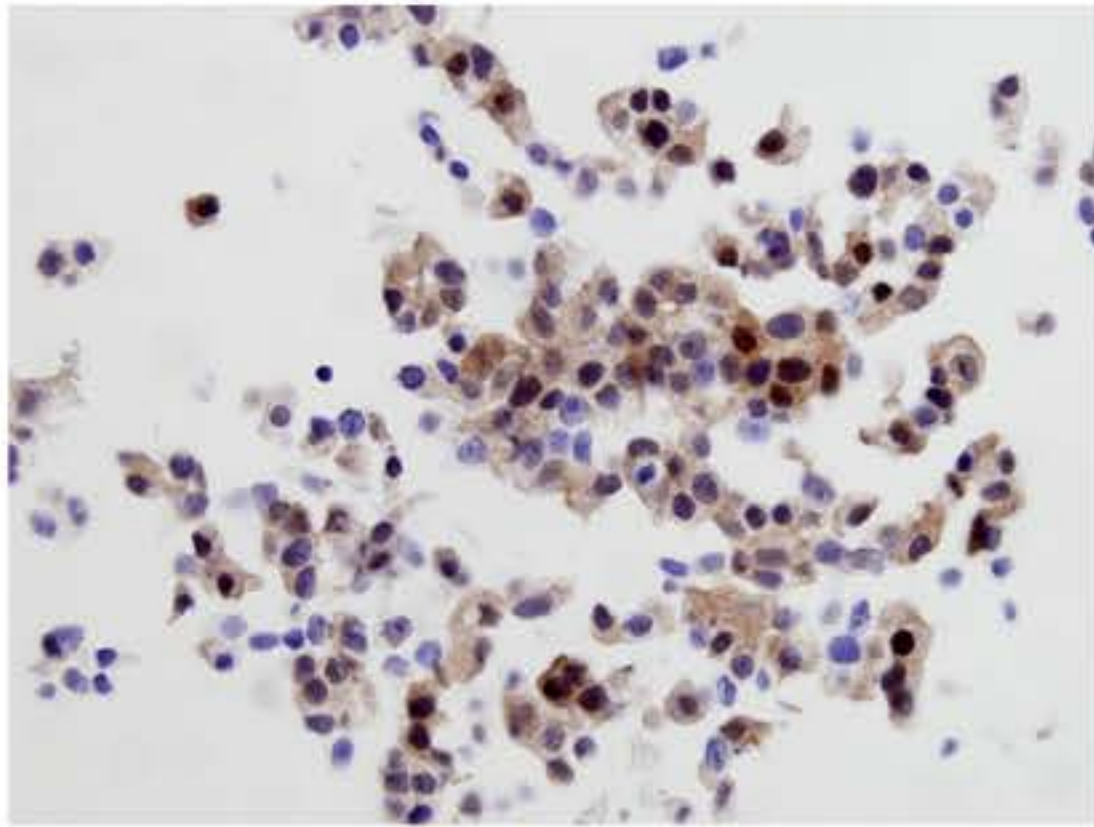 |

## Supplementary Figure S4

A

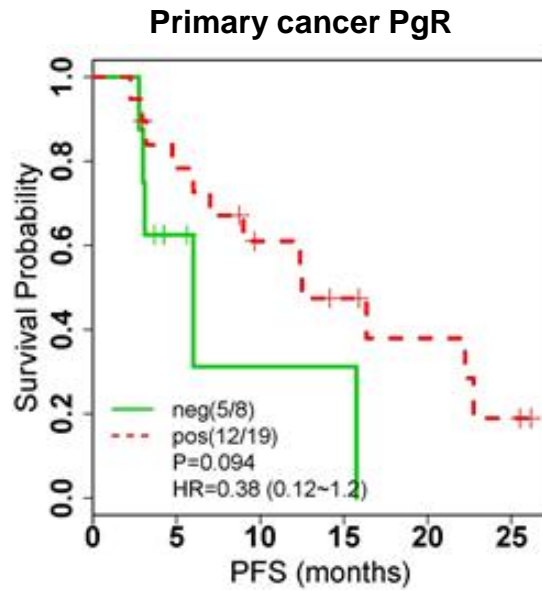

B

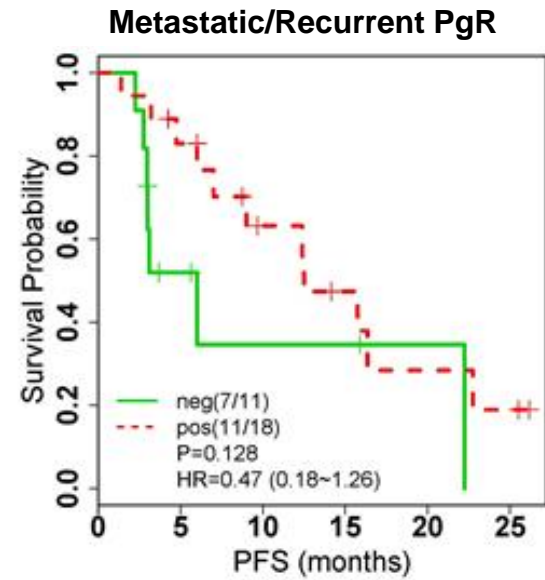

Supplement: NIHMS769674-supplement-Supplemental_material_and_figures.pdf [file NIHMS769674-supplement-Supplemental_material_and_figures.pdf]
